# Supplementary material
Source: PubMed Central journal article supplement (PMC539785)

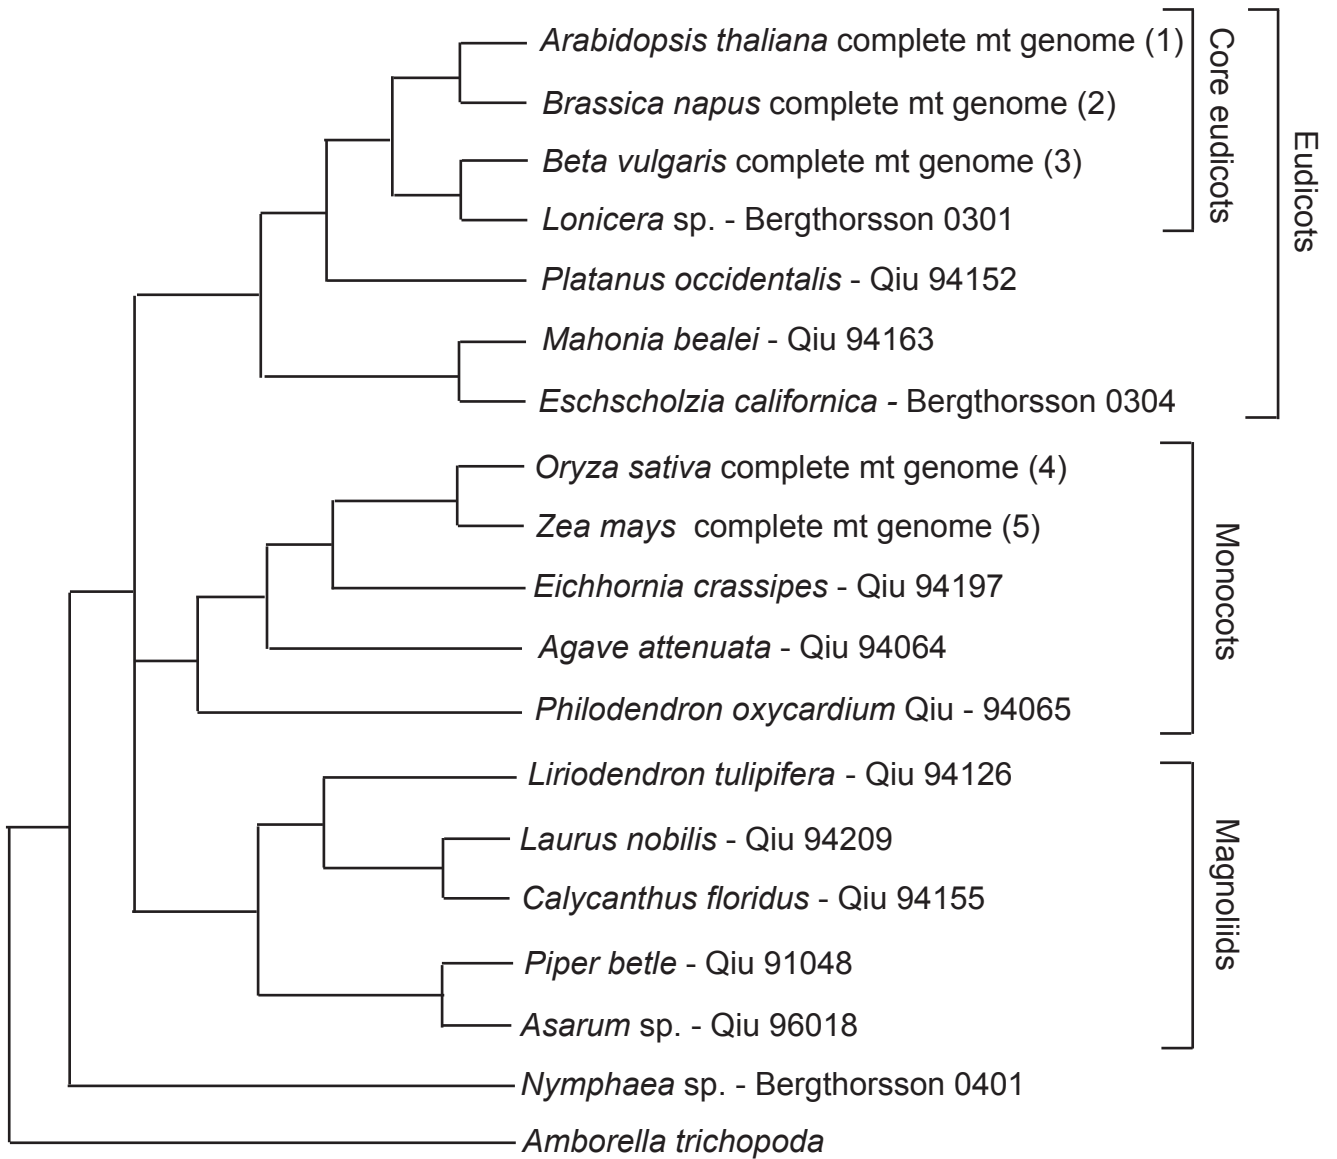

Supplement: pnas_101_51_17747__1.pdf [file pnas_101_51_17747__1.pdf]

*nad5* intron

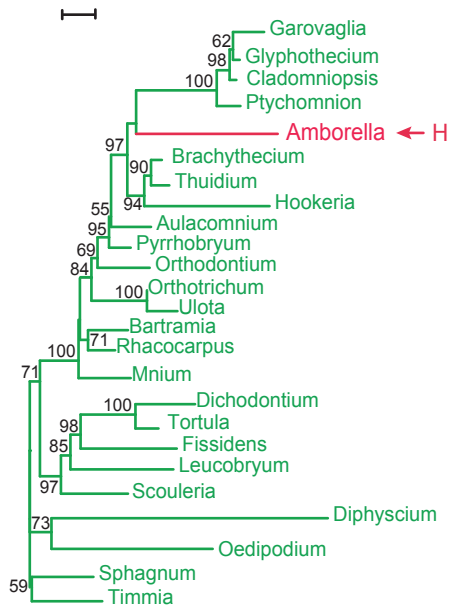

*nad7* intron

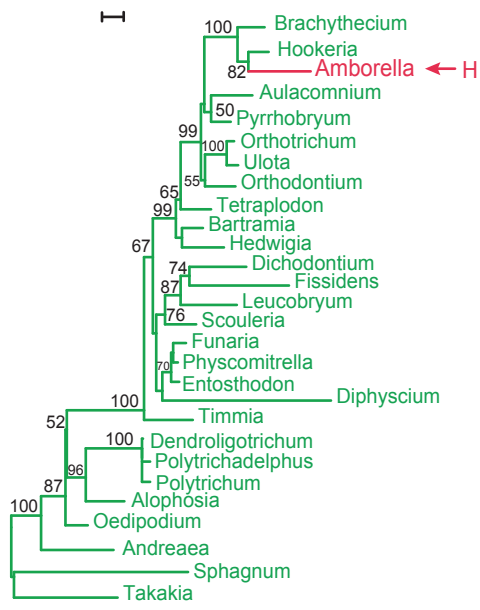

*nad2* intron

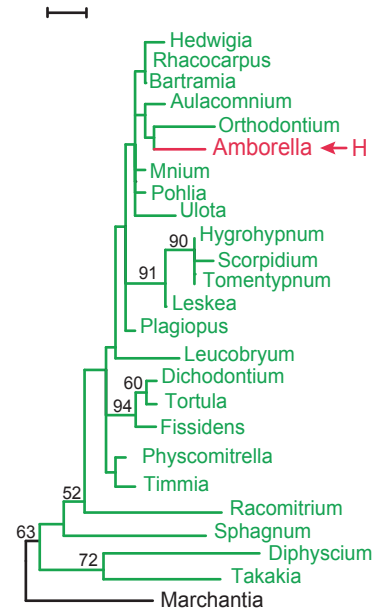

Supplement: pnas_101_51_17747__2.pdf [file pnas_101_51_17747__2.pdf]

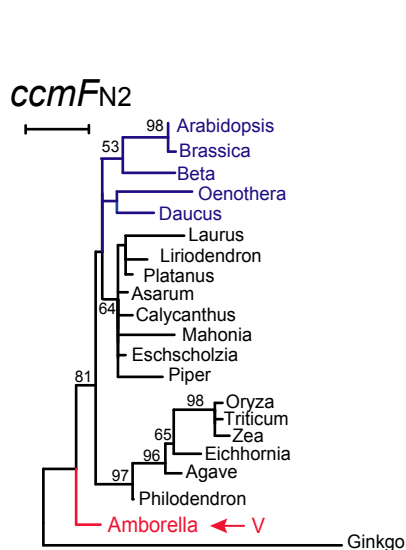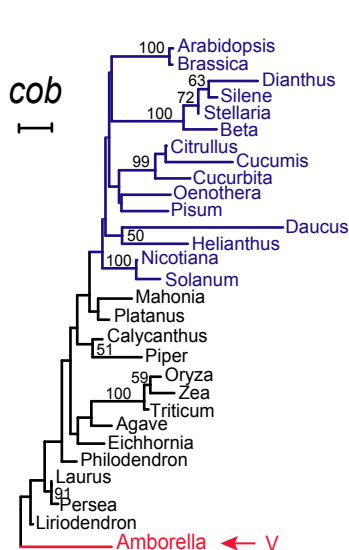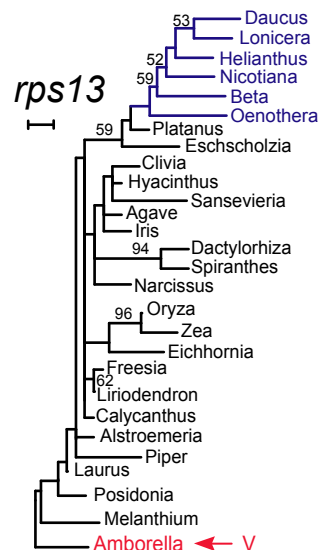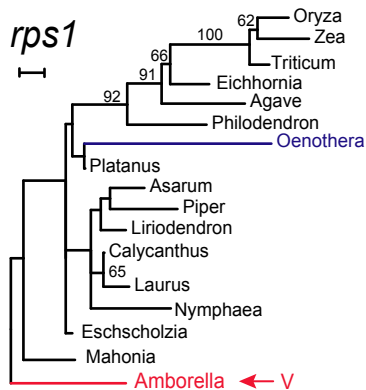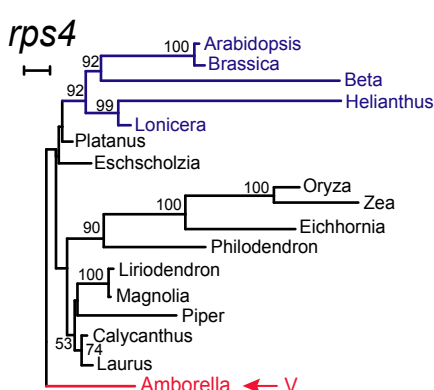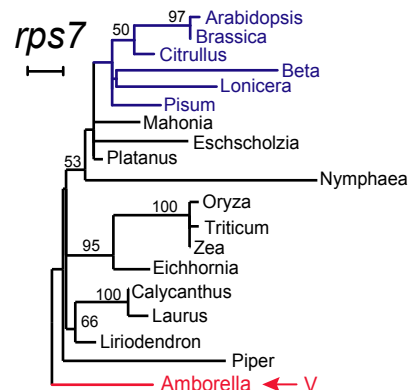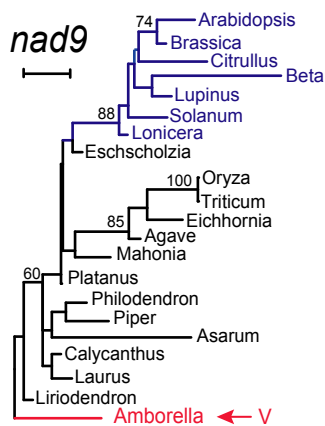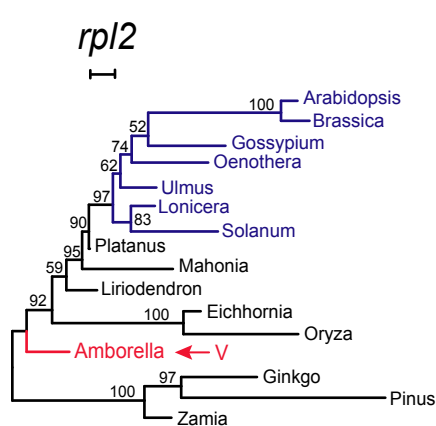

Supplement: pnas_101_51_17747__3.pdf [file pnas_101_51_17747__3.pdf]
